# Supplementary material for: Impact of blood meals taken on ivermectin-treated livestock on survival and egg production of the malaria vector Anopheles coluzzii under laboratory conditions
Source: PubMed Central journal article supplement (PMC11326554; doi:10.1371/journal.pone.0308293), 2024-08-15
Supplement: pone.0308293.s001.pdf [file pone.0308293.s001.pdf]

**Supporting S1 Table: Number of exposed, blood-fed and dissected female *Anopheles* according to the hosts species, the treatment and the time elapsed since the injection (DAI)**

| Hosts species            | DAI    | Control              |             |             |             |             | Therapeutic dose        |             |             |             |            | Double therapeutic dose |             |            |            |            | Triple therapeutic dose |             |            |            |            |  |
|--------------------------|--------|----------------------|-------------|-------------|-------------|-------------|-------------------------|-------------|-------------|-------------|------------|-------------------------|-------------|------------|------------|------------|-------------------------|-------------|------------|------------|------------|--|
|                          |        | T1                   | G1          | T2          | G2          | Diss.       | T1                      | G1          | T2          | G2          | Diss.      | T1                      | G1          | T2         | G2         | Diss.      | T1                      | G1          | T2         | G2         | Diss.      |  |
| Sheep                    |        | Ivermectin : 0 mg/kg |             |             |             |             | Ivermectin at 0.2 mg/kg |             |             |             |            |                         |             |            |            |            |                         |             |            |            |            |  |
|                          | Before | 472                  | 443         | 292         | 121         | 71          | 512                     | 471         | 274         | 132         | 99         | -                       | -           | -          | -          | -          | -                       | -           | -          | -          | -          |  |
|                          | 2 DAI  | 445                  | 209         | 138         | 101         | 47          | 555                     | 356         | 56          | 34          | 34         | -                       | -           | -          | -          | -          | -                       | -           | -          | -          | -          |  |
|                          | 7 DAI  | 411                  | 205         | 100         | 91          | 60          | 345                     | 246         | 90          | 61          | 23         | -                       | -           | -          | -          | -          | -                       | -           | -          | -          | -          |  |
|                          | 14 DAI | 196                  | 190         | 84          | 72          | 41          | 266                     | 173         | 93          | 69          | 55         | -                       | -           | -          | -          | -          | -                       | -           | -          | -          | -          |  |
|                          | 21 DAI | 434                  | 275         | 148         | 74          | 43          | 372                     | 229         | 135         | 73          | 60         | -                       | -           | -          | -          | -          | -                       | -           | -          | -          | -          |  |
|                          | 28 DAI | 403                  | 269         | 124         | 77          | 54          | 404                     | 326         | 182         | 123         | 65         | -                       | -           | -          | -          | -          | -                       | -           | -          | -          | -          |  |
| <b>Sub total (sheep)</b> |        | <b>2361</b>          | <b>1591</b> | <b>886</b>  | <b>536</b>  | <b>316</b>  | <b>2454</b>             | <b>1801</b> | <b>830</b>  | <b>492</b>  | <b>336</b> | -                       | -           | -          | -          | -          | -                       | -           | -          | -          |            |  |
| Goat                     |        | Ivermectin : 0 mg/kg |             |             |             |             | Ivermectin at 0.4 mg/kg |             |             |             |            |                         |             |            |            |            |                         |             |            |            |            |  |
|                          | Before | 643                  | 528         | 366         | 209         | 118         | 647                     | 590         | 351         | 292         | 117        | -                       | -           | -          | -          | -          | -                       | -           | -          | -          | -          |  |
|                          | 2 DAI  | 493                  | 380         | 159         | 108         | 69          | 502                     | 446         | 170         | 137         | 62         | -                       | -           | -          | -          | -          | -                       | -           | -          | -          | -          |  |
|                          | 7 DAI  | 629                  | 524         | 381         | 163         | 118         | 625                     | 493         | 297         | 79          | 79         | -                       | -           | -          | -          | -          | -                       | -           | -          | -          | -          |  |
|                          | 14 DAI | 547                  | 365         | 35          | 89          | 64          | 515                     | 297         | 128         | 68          | 68         | -                       | -           | -          | -          | -          | -                       | -           | -          | -          | -          |  |
|                          | 21 DAI | 544                  | 354         | 145         | 123         | 101         | 514                     | 266         | 100         | 86          | 63         | -                       | -           | -          | -          | -          | -                       | -           | -          | -          | -          |  |
|                          | 28 DAI | 384                  | 258         | 109         | 65          | 44          | 372                     | 209         | 58          | 55          | 34         | -                       | -           | -          | -          | -          | -                       | -           | -          | -          | -          |  |
| <b>Sub total (goat)</b>  |        | <b>3240</b>          | <b>2409</b> | <b>1195</b> | <b>757</b>  | <b>514</b>  | <b>3175</b>             | <b>2301</b> | <b>1104</b> | <b>717</b>  | <b>423</b> | -                       | -           | -          | -          | -          | -                       | -           | -          | -          |            |  |
| Pig                      |        | Ivermectin : 0 mg/kg |             |             |             |             | Ivermectin at 0.3 mg/kg |             |             |             |            | Ivermectin at 0.6 mg/kg |             |            |            |            | Ivermectin at 0.9 mg/kg |             |            |            |            |  |
|                          | Before | 359                  | 165         | 70          | 54          | 45          | 301                     | 195         | 90          | 47          |            | 373                     | 191         | 106        | 76         | 58         | 325                     | 171         | 82         | 61         | 37         |  |
|                          | 2 DAI  | 238                  | 80          | 0           | 0           | 0           | 300                     | 151         | 34          | 81          | 11         | 223                     | 101         | 18         | 17         | 07         | 341                     | 125         | 13         | 13         | 03         |  |
|                          | 7 DAI  | 371                  | 284         | 223         | 211         | 80          | 292                     | 198         | 67          | 51          | 29         | 343                     | 198         | 25         | 17         | 08         | 333                     | 258         | 36         | 27         | 09         |  |
|                          | 14 DAI | 508                  | 268         | 158         | 95          | 64          | 474                     | 268         | 166         | 86          | 48         | 442                     | 213         | 118        | 81         | 77         | 583                     | 412         | 162        | 100        | 63         |  |
|                          | 21 DAI | 234                  | 130         | 52          | 25          | 20          | 233                     | 98          | 17          | 13          | 05         | 267                     | 181         | 84         | 52         | 45         | 199                     | 137         | 50         | 36         | 48         |  |
|                          | 28 DAI | 145                  | 81          | 18          | 05          | 04          | 178                     | 72          | 11          | 07          | 07         | 230                     | 169         | 78         | 45         | 42         | 171                     | 146         | 59         | 46         | 41         |  |
| <b>Subtotal (pig)</b>    |        | <b>1855</b>          | <b>1008</b> | <b>521</b>  | <b>390</b>  | <b>213</b>  | <b>1778</b>             | <b>982</b>  | <b>385</b>  | <b>285</b>  | <b>100</b> | <b>1878</b>             | <b>1053</b> | <b>429</b> | <b>288</b> | <b>237</b> | <b>1952</b>             | <b>1249</b> | <b>402</b> | <b>283</b> | <b>201</b> |  |
| <b>General total</b>     |        | <b>7456</b>          | <b>5008</b> | <b>2602</b> | <b>1683</b> | <b>1043</b> | <b>7407</b>             | <b>5084</b> | <b>2319</b> | <b>1494</b> | <b>859</b> | <b>1878</b>             | <b>1053</b> | <b>429</b> | <b>288</b> | <b>237</b> | <b>1952</b>             | <b>1249</b> | <b>402</b> | <b>283</b> | <b>201</b> |  |

Legend: DAI: Day after injection; T1: number of mosquitoes exposed at the first exposition; G1: number of mosquitoes that fed at T1; T2: number of mosquitoes exposed at the second blood-feeding; G2: number of mosquitoes that fed at T2; Diss: number of mosquitoes dissected for fecundity characterization.
