# Supplementary material for: Impact of blood meals taken on ivermectin-treated livestock on survival and egg production of the malaria vector Anopheles coluzzii under laboratory conditions
Source: PubMed Central journal article supplement (PMC11326554; doi:10.1371/journal.pone.0308293), 2024-08-15
Supplement: pone.0308293.s002.pdf [file pone.0308293.s002.pdf]

## **Supporting S1 File.**

### **Preliminary study: efficacy of blood meal taken on treated pigs with therapeutic dose of ivermectin, on the survival of *Anopheles coluzzii***

The methodology was the same than the main study. Six (6) pigs were used in the activity (3 control and 3 injected subcutaneously with ivermectin at dose of 0.3 mg/ kg body weight).

A total of 4,155 females were exposed to pigs and 2,170 took blood meal, that is a global engorged rate of 52.27%.

#### **Survival of *An. coluzzii* fed on pigs treated with therapeutic dose of ivermectin**

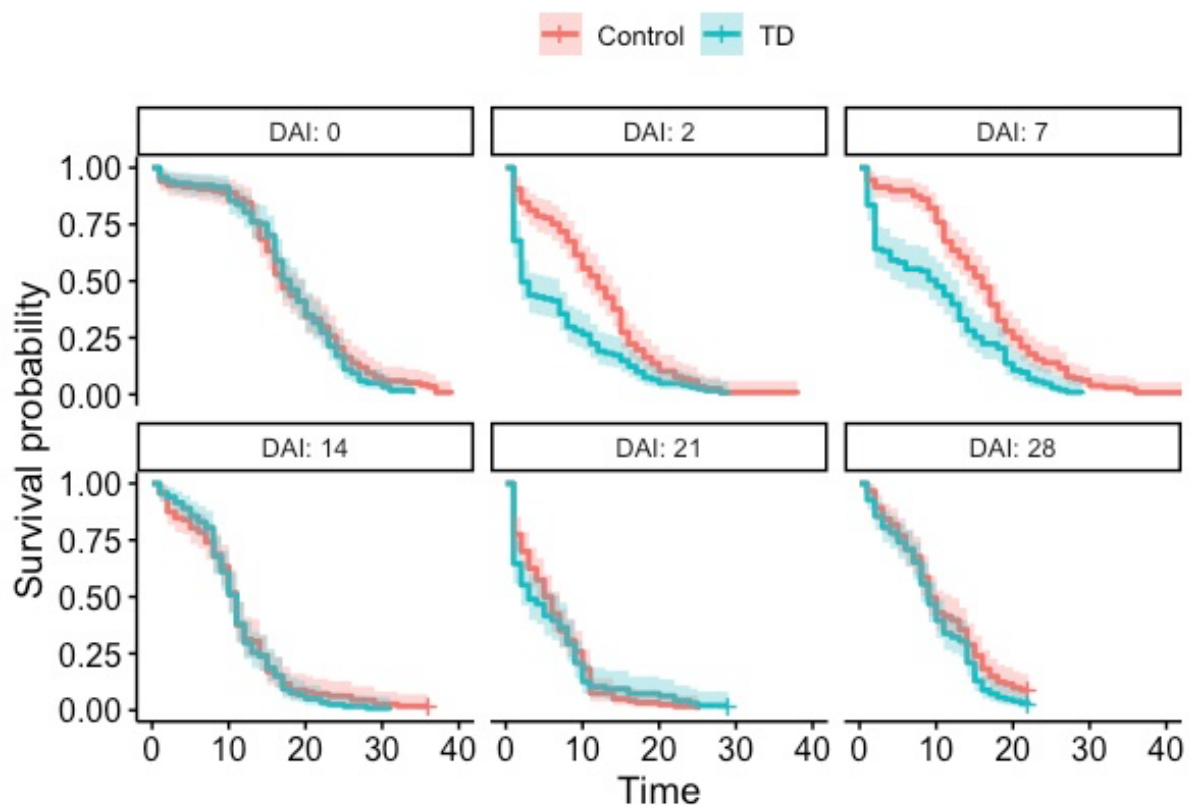

**Figure 1. Kaplan-Meier curves showing the survival of mosquitoes fed on pigs from the control and therapeutic dose of ivermectin (TD = 0.3mg/kg) before treatment (DAI = 0) at different Days After Injection (DAI: 2, 7, 14, 21 and 28 days after injection of ivermectin dose.**

Before the injection of ivermectin to the pigs during the first experiment, there was no significant effect to individual animal on the anopheles' survival ( $X^2_5 = 6.51$ ;  $P = 0.26$ ). After the injection of a recommended dose of ivermectin to pigs, the analysis shows the significant difference of survival due to the effect of the delay post injection ( $X^2_5 = 273.83$ ;  $P < 0.001$ ), of the ivermectin treatment ( $X^2_5 = 5.59$ ;  $P = 0.02$ ), and of their interaction ( $X^2_5 = 26.63$ ;  $P < 0.001$ ). The ivermectin treatment decreased anopheles' survival on day 2 (HR = 1.89, IC [1.43 – 2.50],  $P < 0.001$ ) and day 7 (HR = 1.92, IC [1.44 – 2.56],  $P < 0.001$ ).

At 2 DAI, the median survival time of *Anopheles* was 2 days (IC= [2 – 7] days) for the treated group and 12 days (IC= [10 – 14] days) for the control group, representing a decrease of survival of 83.33 % in the treated group. At 7 DAI, the median survival time of *Anopheles* was 10 days (IC= [5 – 13] days) for the treated group whereas it was 16 days (IC= [14 – 17] days) for the control group, representing a decrease of 37.5%.
