# Supplementary material for: Impact of blood meals taken on ivermectin-treated livestock on survival and egg production of the malaria vector Anopheles coluzzii under laboratory conditions
Source: PubMed Central journal article supplement (PMC11326554; doi:10.1371/journal.pone.0308293), 2024-08-15
Supplement: pone.0308293.s003.pdf [file pone.0308293.s003.pdf]

## **Supporting S2 file : Gravity rate and fecundity in females *Anopheles coluzzii* fed on pig**

Before the injection of IVM, gravidity rates of *An. coluzzii* females were different for control and treated groups of pigs (Figure 1). There was a significant lower gravidity rate for females fed on the group of pigs to be treated with the therapeutic dose (OR = 4.00, IC [1.93 – 156],  $P = 0.02$ ) and the double dose group (OR = 4, IC [1.23 – 11],  $P = 0.01$ ) compared to those fed on the control one (Figure 1).

The only significant difference in gravidity rate was observed between *Anopheles coluzzii* females fed on control and treated pigs 7 DAI after injection of the therapeutic dose of ivermectin (OR = 7, IC [1.93 – 22],  $P = 0.004$ ).

Also, the treatment with IVM did not show any effect on *An. coluzzii* fecundity, regardless the treatment dose or the DAI (Figure 2).

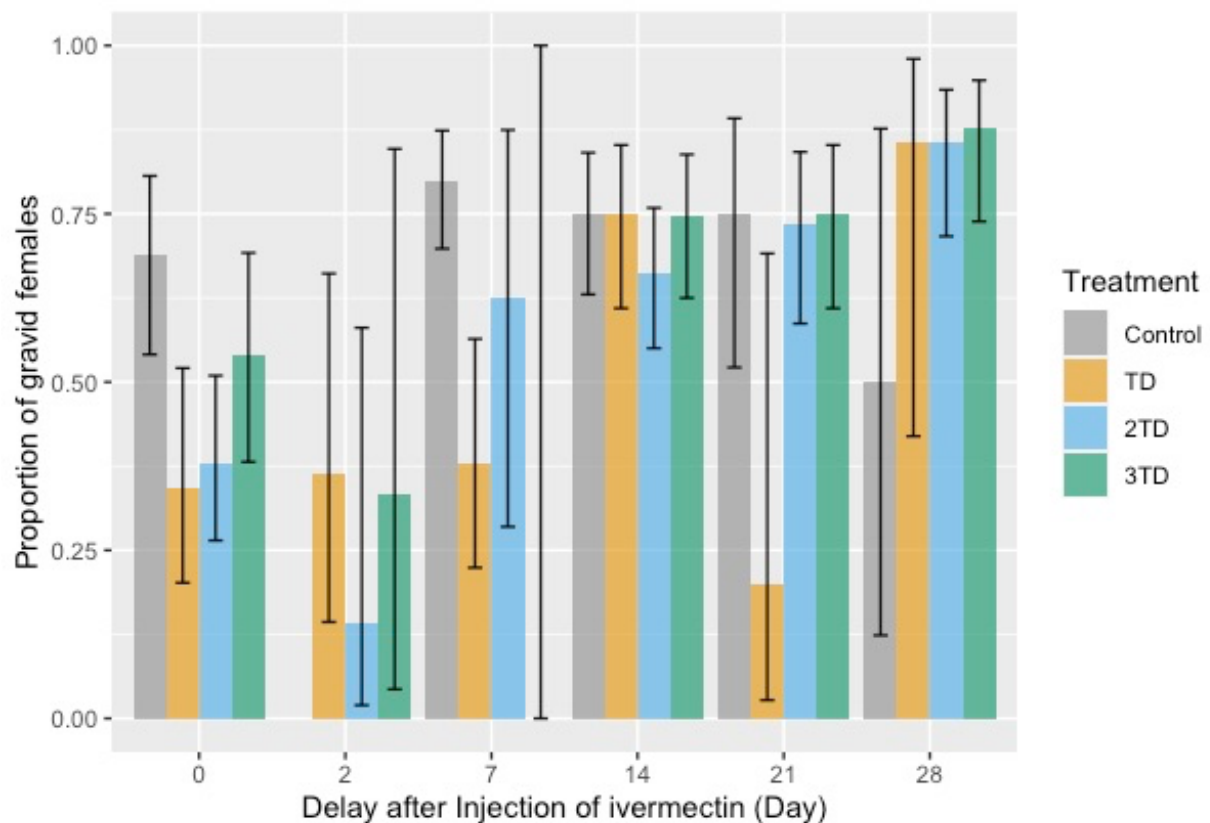

**Figure 1. Proportion of gravid females of *Anopheles coluzzii* fed on control or treated pigs with different dose of ivermectin (TD: Therapeutic dose = 0.3 mg/kg; 2TD = 2-fold therapeutic dose; 3TD = 3-fold therapeutic dose). The error bars correspond to the Standard error.**

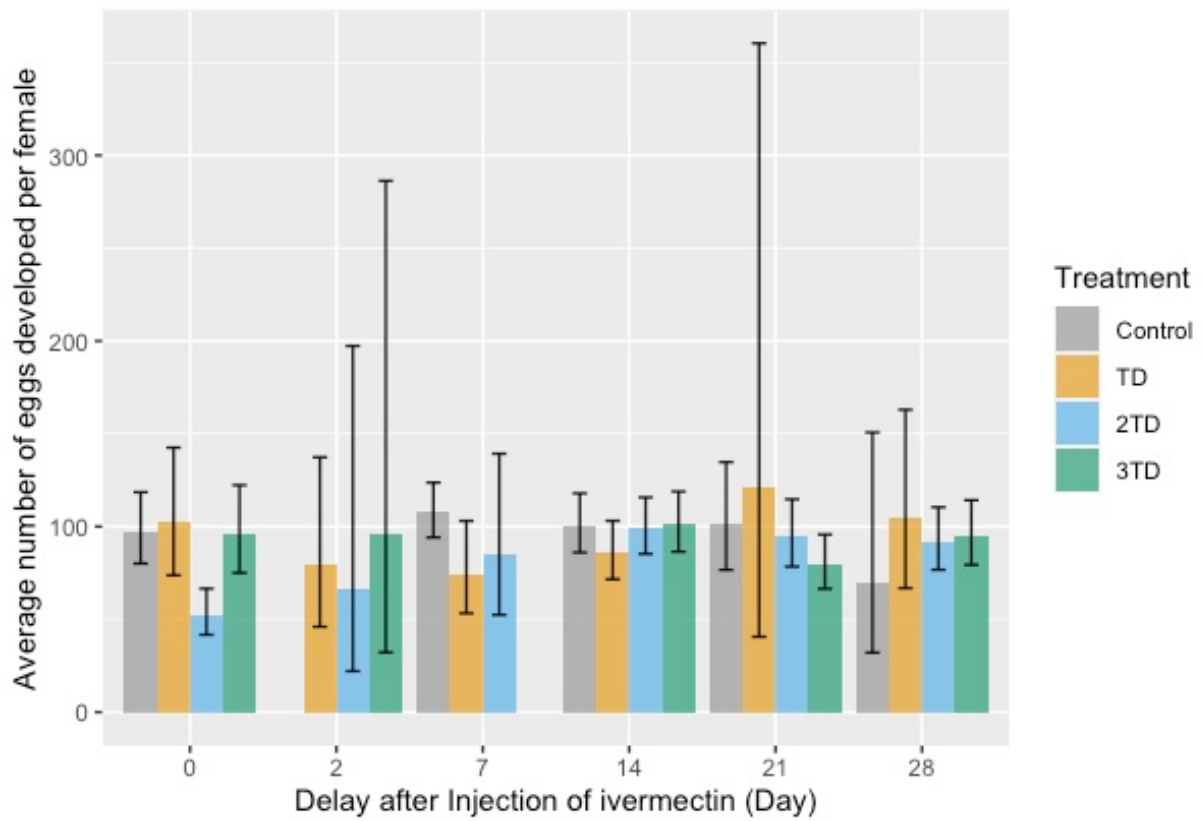

**Figure 2.** Average number of eggs developed by gravid females of *Anopheles coluzzii* fed on control or treated pigs with different dose of ivermectin (TD: Therapeutic dose = 0.3 mg/kg; 2TD = 2-fold therapeutic dose; 3TD = 3-fold therapeutic dose). The error bars correspond to the Standard error.
